# Supplementary material
Source: PubMed Central journal article supplement (PMC7849303)
Supplement: EMBJ-40-e105819-s001.pdf [file EMBJ-40-e105819-s001.pdf]

# **Lamin B1 decline underlies age-related loss of adult hippocampal neurogenesis**

Tracy A. Bedrosian<sup>1,3,‡</sup>, Judith Houtman<sup>2,‡</sup>, Juan Sebastian Eguiguren<sup>2</sup>, Saeed Ghassemzadeh<sup>1</sup>, Nicole Rund<sup>2</sup>, Nicole M. Novaresi<sup>1</sup>, Lauren Hu<sup>1</sup>, Sarah Parylak<sup>1</sup>, Ahmet M. Denli<sup>1</sup>, Lynne Randolph-Moore<sup>1</sup>, Takashi Namba<sup>4,5</sup>, Fred H. Gage<sup>1</sup> and Tomohisa Toda<sup>1,2,6\*</sup>

<sup>1</sup>Laboratory of Genetics, The Salk Institute for Biological Studies, 10010 North Torrey Pines Road, La Jolla, CA 92037, USA

<sup>2</sup>Nuclear Architecture in Neural Plasticity and Aging, German Center for Neurodegenerative Diseases, Dresden, 01307, Germany

<sup>3</sup>Institute for Genomic Medicine, Nationwide Children's Hospital, Columbus, OH 43205, USA

<sup>4</sup>Max Planck Institute of Molecular Cell Biology and Genetics, 01307 Dresden, Germany

<sup>5</sup>Neuroscience Center, HiLIFE-Helsinki Institute of Life Science, University of Helsinki, Helsinki 00014, Finland

<sup>6</sup>Paul F. Glenn Center for Biology of Aging Research at the Salk Institute, 10010 North Torrey Pines Road, La Jolla, CA 92037, USA

<sup>‡</sup>, These authors contributed equally to this work

\*Correspondence to:

Dr. Tomohisa Toda

Email: [tomohisa.toda@dzne.de](mailto:tomohisa.toda@dzne.de)

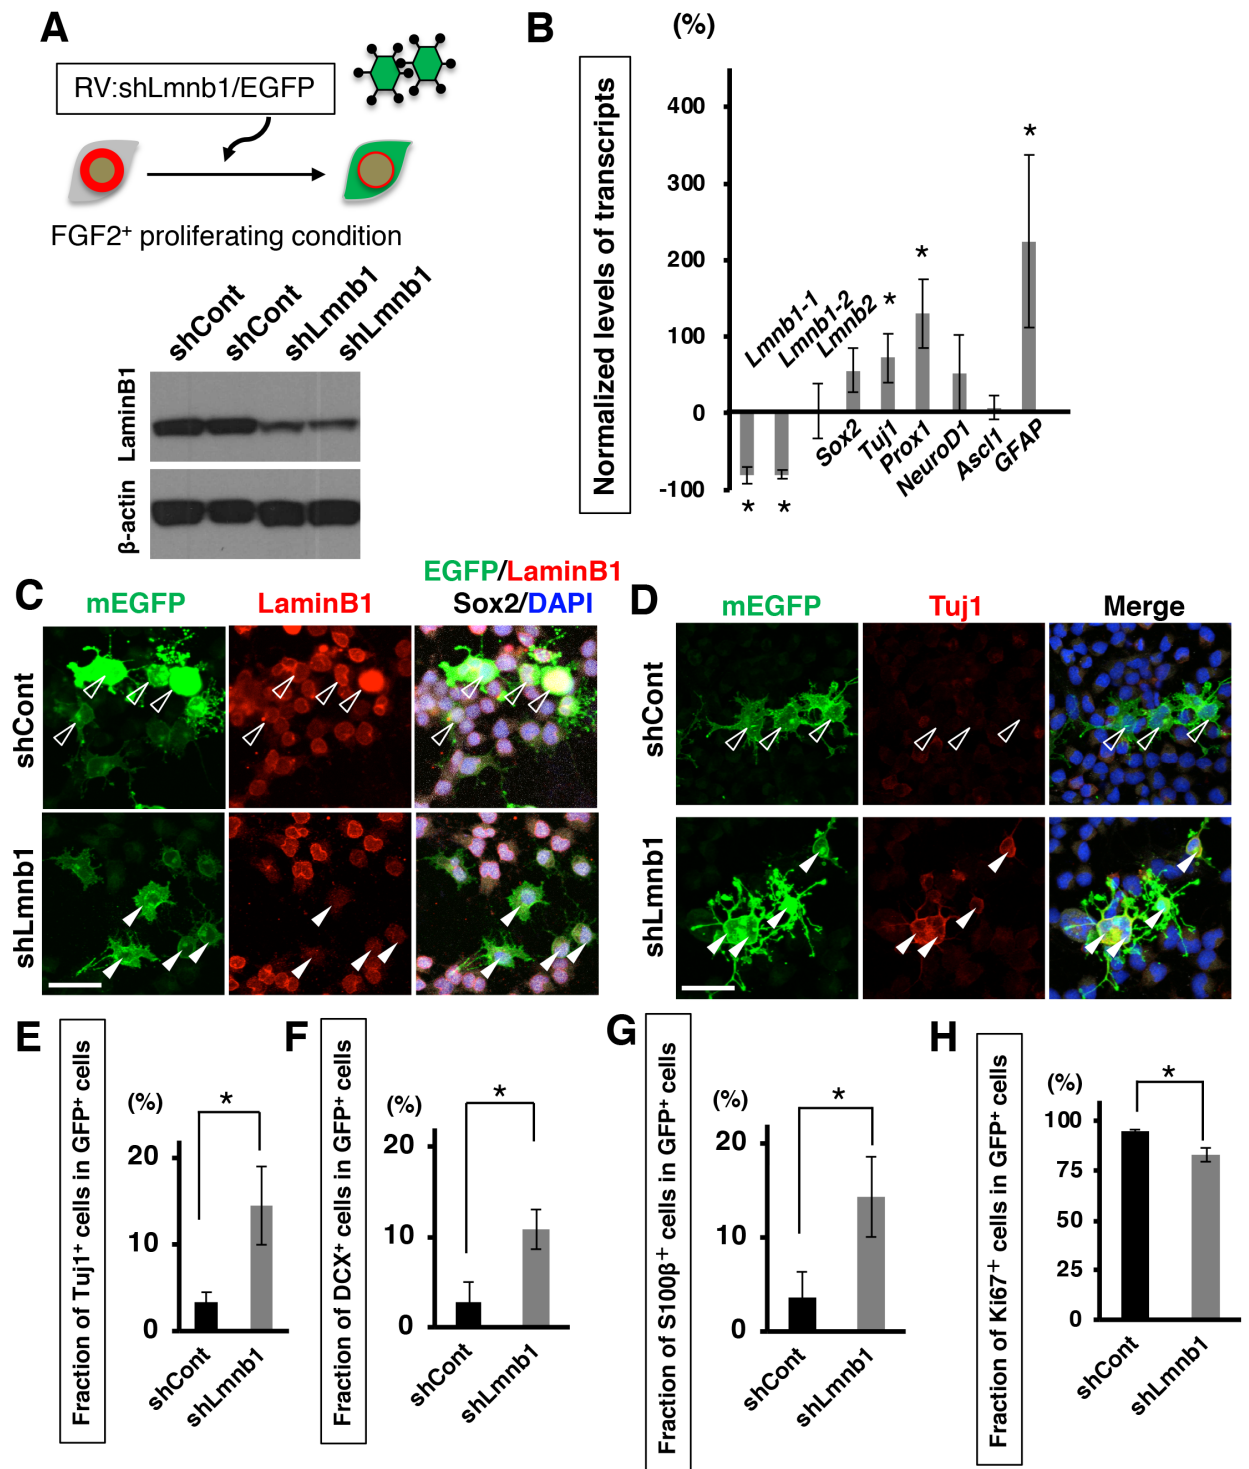

Appendix Figure S1. Knockdown of lamin B1 in NPCs induces differentiation

- A.** Western blot analysis showing the knockdown of lamin B1 protein in NPCs three days after RV-mediated shRNA delivery.
- B.** qRT-PCR showing that knockdown of *Lmnbl* induced markers of neural differentiation. \*p < 0.05, one sample t-test (n =4).
- C, D.** Knockdown of *Lmnbl* induced the expression of Tuj1 under proliferation conditions.
- E-H.** Quantitative analysis of Tuj1-, DCX-, S100 $\beta$ - and Ki67-positive cells in shRNA-delivered cells (GFP-positive cells) 3 days after the transfection. \*p < 0.05, Student's *t* test, n =3. Data are presented as mean  $\pm$  s.d. Scale bars, 25  $\mu$ m in (C, D).
