# Supplementary material
Source: PubMed Central journal article supplement (PMC7849303)
Supplement: EMBJ-40-e105819-s002.pdf [file EMBJ-40-e105819-s002.pdf]

## Expanded View Figures

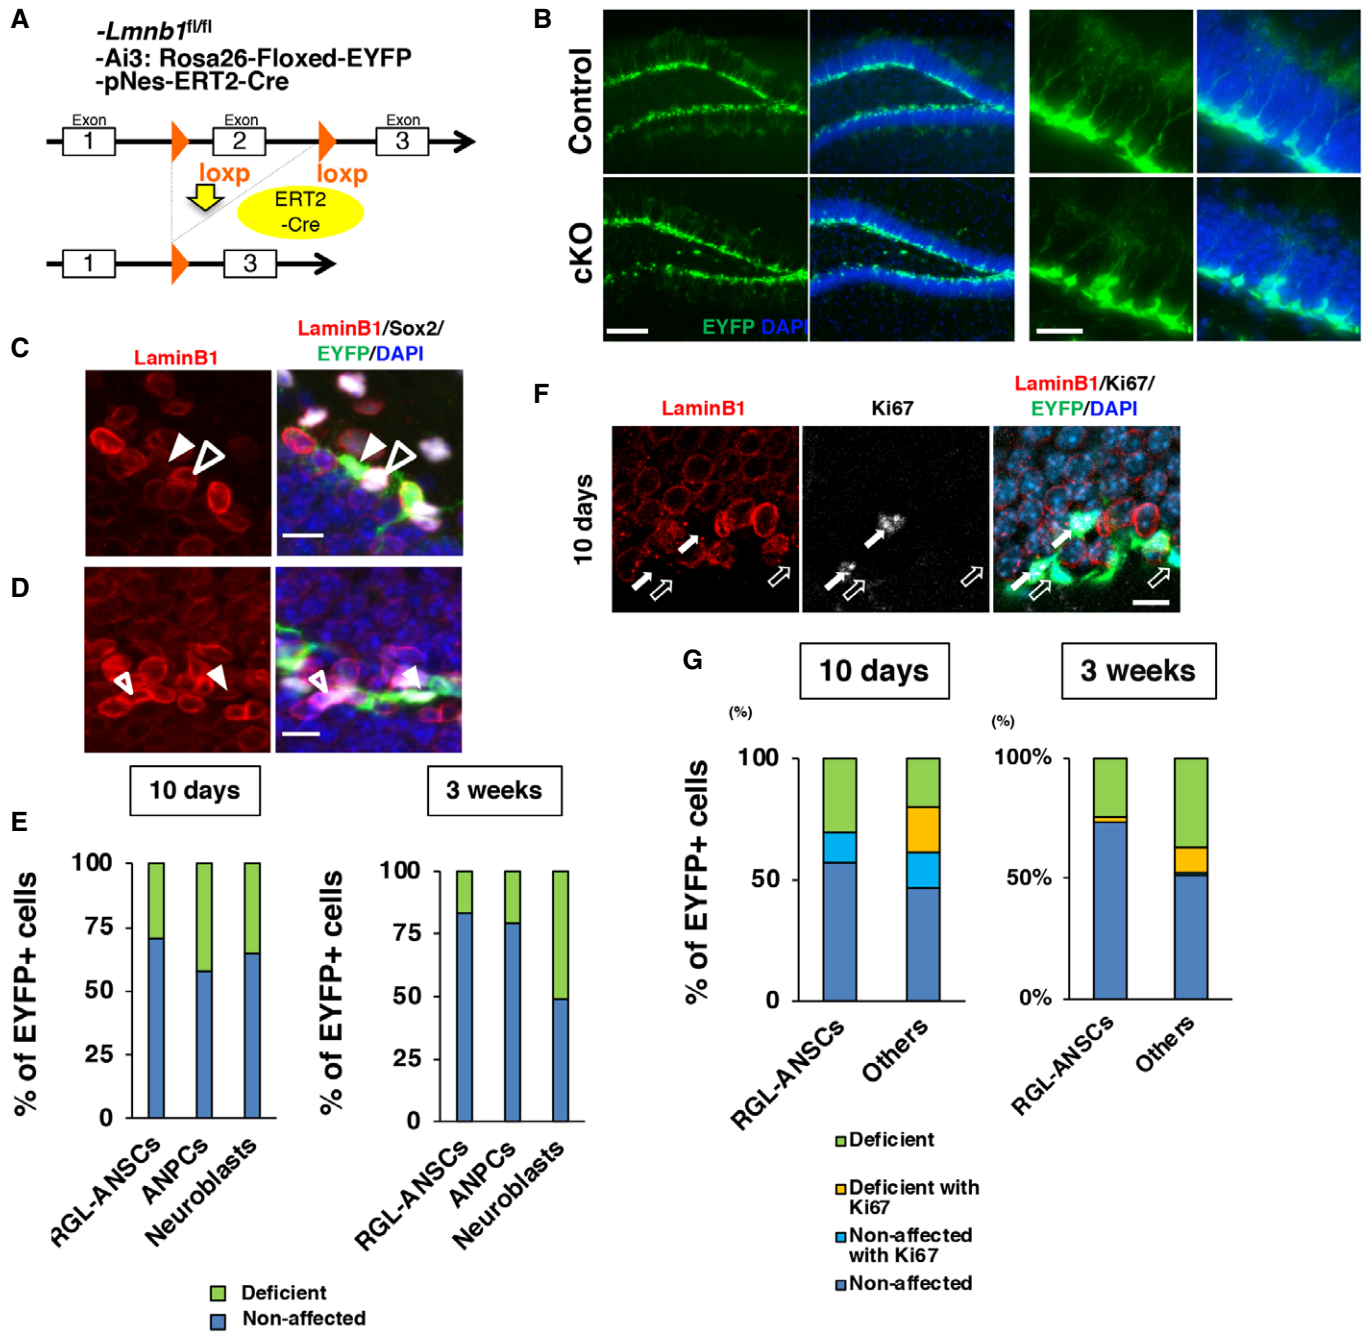

Figure EV1.

**Figure EV1. Generation and evaluation of *Lmnb1* conditional knockout mouse line.**

- A A schematic illustration of *Lmnb1* conditional knockout mouse line (cKO).
- B Induction of EYFP in ANSCPs 10 days after the administration of TAM in the SGZ of DG.
- C, D Representative images of lamin B1 complete-loss cell (arrowhead) and non-EYFP ANPC (open arrowhead) (C), lamin B1 partial-loss cell (arrowhead), and non-EYFP ANPC (open arrowhead) (D).
- E The fractions of EYFP+ cells with lamin B1 deficiency for each cell type 10 days or 3 weeks after TAM administration (Total number of counted cells, 10 days; RGL-ANSCs. 81 cells, ANPCs = 116 cells, Neuroblasts = 74 cells from 3 animals; 3 weeks, RGL-ANSCs = 39 cells, ANPCs = 59 cells, neuroblasts = 84 cells from 3 animals). Lamin B1-deficient cells are defined as having 30% or more reduced levels of lamin B1 intensity compared to the averaged intensity of the same type of control cells.
- F A confocal image of lamin B1 deficiency in Ki67+ proliferating cells (arrows) 10 days after TAM infusion. Open arrows indicate lamin B1 deficient cells without Ki67.
- G The fraction of lamin B1-deficient cells in Ki67+ proliferating cells. Ki67+ non-RGL cells (others cells) show lamin B1 deficiency whereas only a few Ki67+ RGL-ANSCs exhibit laminB1 deficiency, implying the necessity for cellular proliferation to deplete lamin B1 proteins (Total number of counted cells, 10 days; RGL-ANSCs. 115 cells, non-RGL cells = 196 cells, from 3 animals; 3 weeks; RGL-ANSCs. 42 cells, non-RGL cells = 142 cells, from 3 animals).

Data information: Scale bars, 200  $\mu\text{m}$  in (B, left), 50  $\mu\text{m}$  in (B, right), 10  $\mu\text{m}$  (C, D, F).

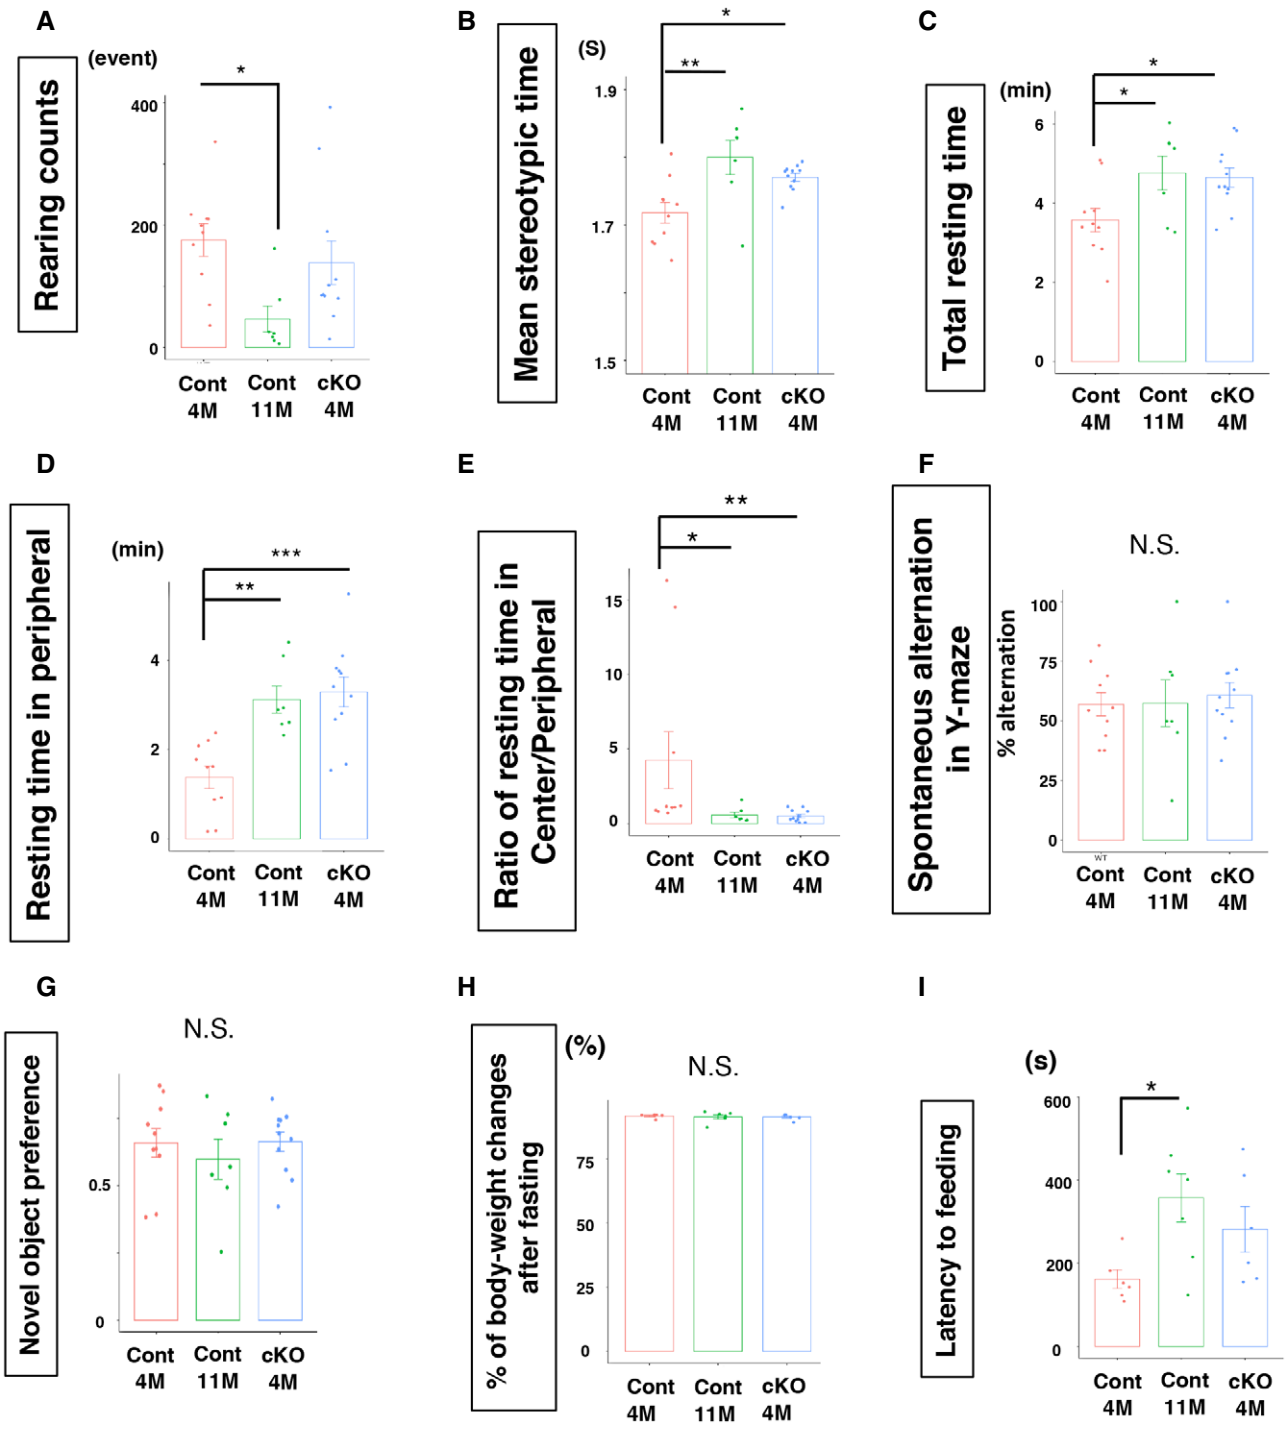

Figure EV2.

**Figure EV2. Increased age-related behavior in Lmnb1-cKO mice.**

- A Rearing counts during the OF test.  $F_{2,25} = 3.95$ ,  $*P = 0.032$ , ANOVA followed by Tukey–Kramer ( $n$ : WT = 10, WT-old = 7, Lmnb1-cKO = 11 for the OF test).
- B Average time spent on stereotypic behavior.  $F_{2,25} = 7.15$ ,  $P = 0.0035$ , ANOVA followed by Tukey–Kramer,  $*P < 0.05$ ,  $**P < 0.01$  ( $n$ : WT = 10, WT-old = 7, Lmnb1-cKO = 11 for the OF test).
- C Total resting time in the OF.  $F_{(2,25)} = 4.65$ ,  $P = 0.018$ , ANOVA followed by Tukey–Kramer,  $*P < 0.05$  ( $n$ : WT = 10, WT-old = 7, Lmnb1-cKO = 11 for the OF test).
- D Total resting time in the peripheral area.  $F_{2,25} = 12.34$ ,  $P = 0.00019$ , ANOVA followed by Tukey–Kramer,  $**P < 0.01$ ,  $***P < 0.001$  ( $n$ : WT = 10, WT-old = 7, Lmnb1-cKO = 11 for the OF test).
- E Ratio of resting time between center and peripheral area. Kruskal–Wallis test followed by Dunn test,  $*P < 0.015$ ,  $**P < 0.01$  ( $n$ : WT = 10, WT-old = 7, Lmnb1-cKO = 11 for the OF test).
- F No significant changes in spontaneous alternation in Y-maze test.  $F_{2,25} = 0.12$ ,  $P = 0.89$ , ANOVA ( $n$ : WT = 10, WT-old = 7, Lmnb1-cKO = 11).
- G Preference to novel object was not different among three groups  $F_{2,25} = 3.39$ ,  $P = 0.45$ , ANOVA ( $n$ : WT = 10, WT-old = 7, Lmnb1-cKO = 11 for the OF test).
- H Proportional body weight loss after 24-h food deprivation for the NSF test  $F_{2,25} = 6.11$ ,  $P = 0.94$ , ANOVA ( $n$ : WT = 6, WT-old = 7, Lmnb1-cKO = 6).
- I Latency to feed in NSF test. Kruskal–Wallis test followed by Steel test,  $*P = 0.038$ , ( $n$ : WT = 6, WT-old = 7, Lmnb1-cKO = 6).

Data information: Data are presented as mean  $\pm$  SEM.

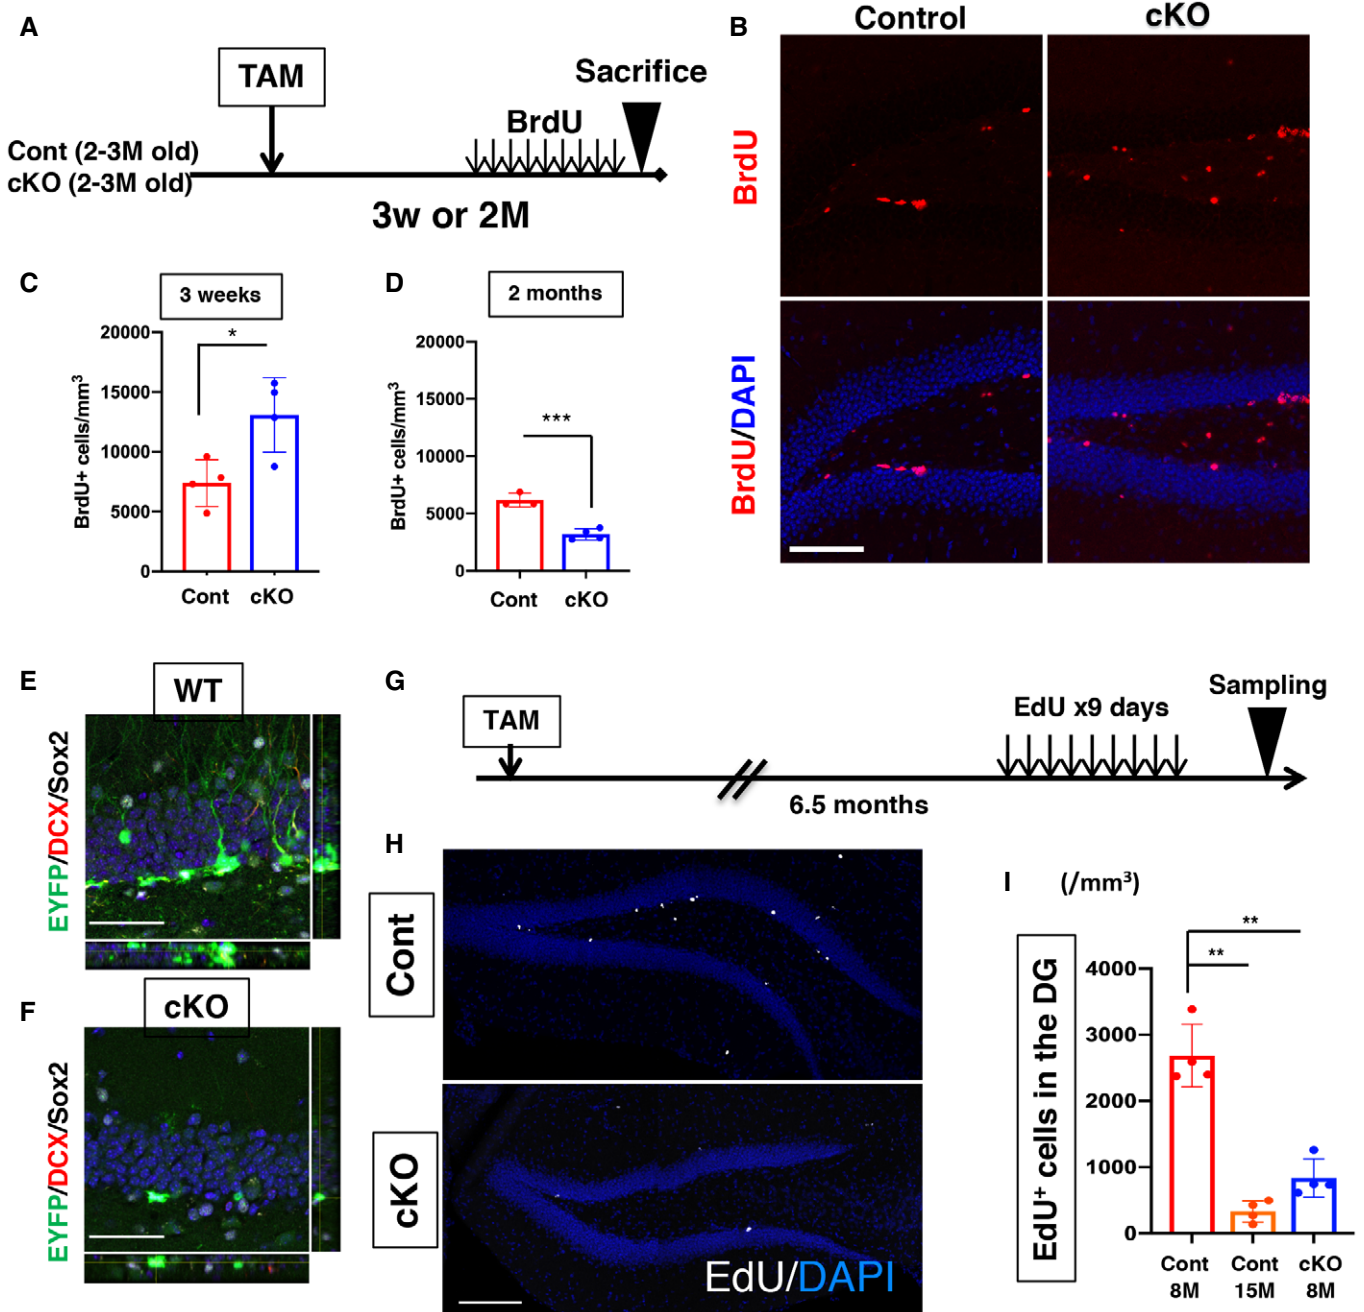

**Figure EV3. Effects of lamin B1 loss on adult hippocampal neurogenesis.**

- A Schematic of BrdU treatment and collection of brain tissue.
- B Representative images of BrdU staining in the DG 3 weeks after TAM administration. BrdU-positive cells were markedly increased in cKO mice.
- C Quantification of BrdU+ cells 3 weeks after TAM administration ( $*P = 0.021$ ,  $t$ -test,  $n = 4$ ).
- D Quantification of BrdU+ cells 2 months after TAM administration ( $***P = 0.0007$ ,  $t$ -test,  $n = 3$  for Control, 4 for cKO).
- E, F Orthogonal views of confocal images to identify cell type of EFYP+ cells.
- G Schematic of EdU treatment and collection of brain tissue.
- H Representative images of EdU-click staining in the DG. EdU-positive cells were markedly reduced in cKO mice.
- I Quantification of EdU-positive cells in the DG indicates that lamin B1 loss induces the prominent reduction of new cell generation in the DG similar to Cont-15M mice.  $**P < 0.01$ , ANOVA ( $P = 0.0009$ ) followed by Tukey–Kramer test ( $n = 4$  for each genotype).

Data information: Data are presented as mean  $\pm$  SD. Scale bars, 100  $\mu$ m in (B), 50  $\mu$ m in (E, F), and 200  $\mu$ m in (H).

**Figure EV4. Lamin B1 is essential for the survival of adult-born cells.**

- A Quantification of EYFP+ NeuN+ neurons 2 months after TAM administration.  $*P = 0.042$ , t-test,  $n = 4$ ).
- B Schematic of BrdU treatment and collection of brain tissue.
- C Representative images of BrdU staining 10 days or 2 months after TAM treatment. Scale bar = 250  $\mu\text{m}$ .
- D Quantification of BrdU-positive cells in each time point. Number of BrdU-positive cells was significantly higher at day 10 ( $*P = 0.049$ , t-test) or 3 weeks ( $*P = 0.019$ , t-test) after TAM in cKO mice, but not at 2 months ( $P = 0.12$ , t-test,  $n = 3$  animals). Data represent mean  $\pm$  SD.
- E The survival ratio of BrdU+ cells from 10 days to 2 months after TAM treatment ( $*P = 0.015$ , t-test,  $n = 3$ ). Data represent mean  $\pm$  SD.
- F Representative images of active caspase3 2 months after TAM treatment. Scale bar = 20  $\mu\text{m}$ .
- G-I Significant difference in the density of active caspase3 was observed 2 months after TAM treatment, but not 3 weeks or 6.5 months after TAM treatment (3 weeks,  $P = 0.86$ ,  $n = 3$ , t-test; 2 months,  $*P = 0.028$ ,  $n = 5-6$ , t-test; 6.5 months,  $P = 0.09$ ,  $n = 4$ , ANOVA). Data are presented as mean  $\pm$  SD.
- J Experimental schema. RV:pSox2-Cre-GFP was injected into the DG of *Lmnb1<sup>fl/fl</sup>:Ai3* or *Lmnb1<sup>+/-</sup>:Ai3* mice and the morphology of EYFP+ newborn neurons was assessed at 21dpi. Scale bar = 20  $\mu\text{m}$ .
- K Dendritic reconstruction of RV-labeled neurons derived from WT and cKO mice. Scale bars = 20  $\mu\text{m}$ .
- L, M Total dendrite length (L) and total numbers of branches (M) were quantified (65 cells for control, 35 cells for cKO from 3 animals per genotype; total length,  $*P = 0.0147$ ; number of branches,  $P = 0.099$ , Mann-Whitney test). Data are presented as mean  $\pm$  SEM.
- N Sholl analysis of neurite length.  $**P < 0.01$ ,  $*P < 0.05$  (t-test) (65 cells for control, 35 cells for cKO from 3 animals per genotype). Data are presented as mean  $\pm$  SEM.

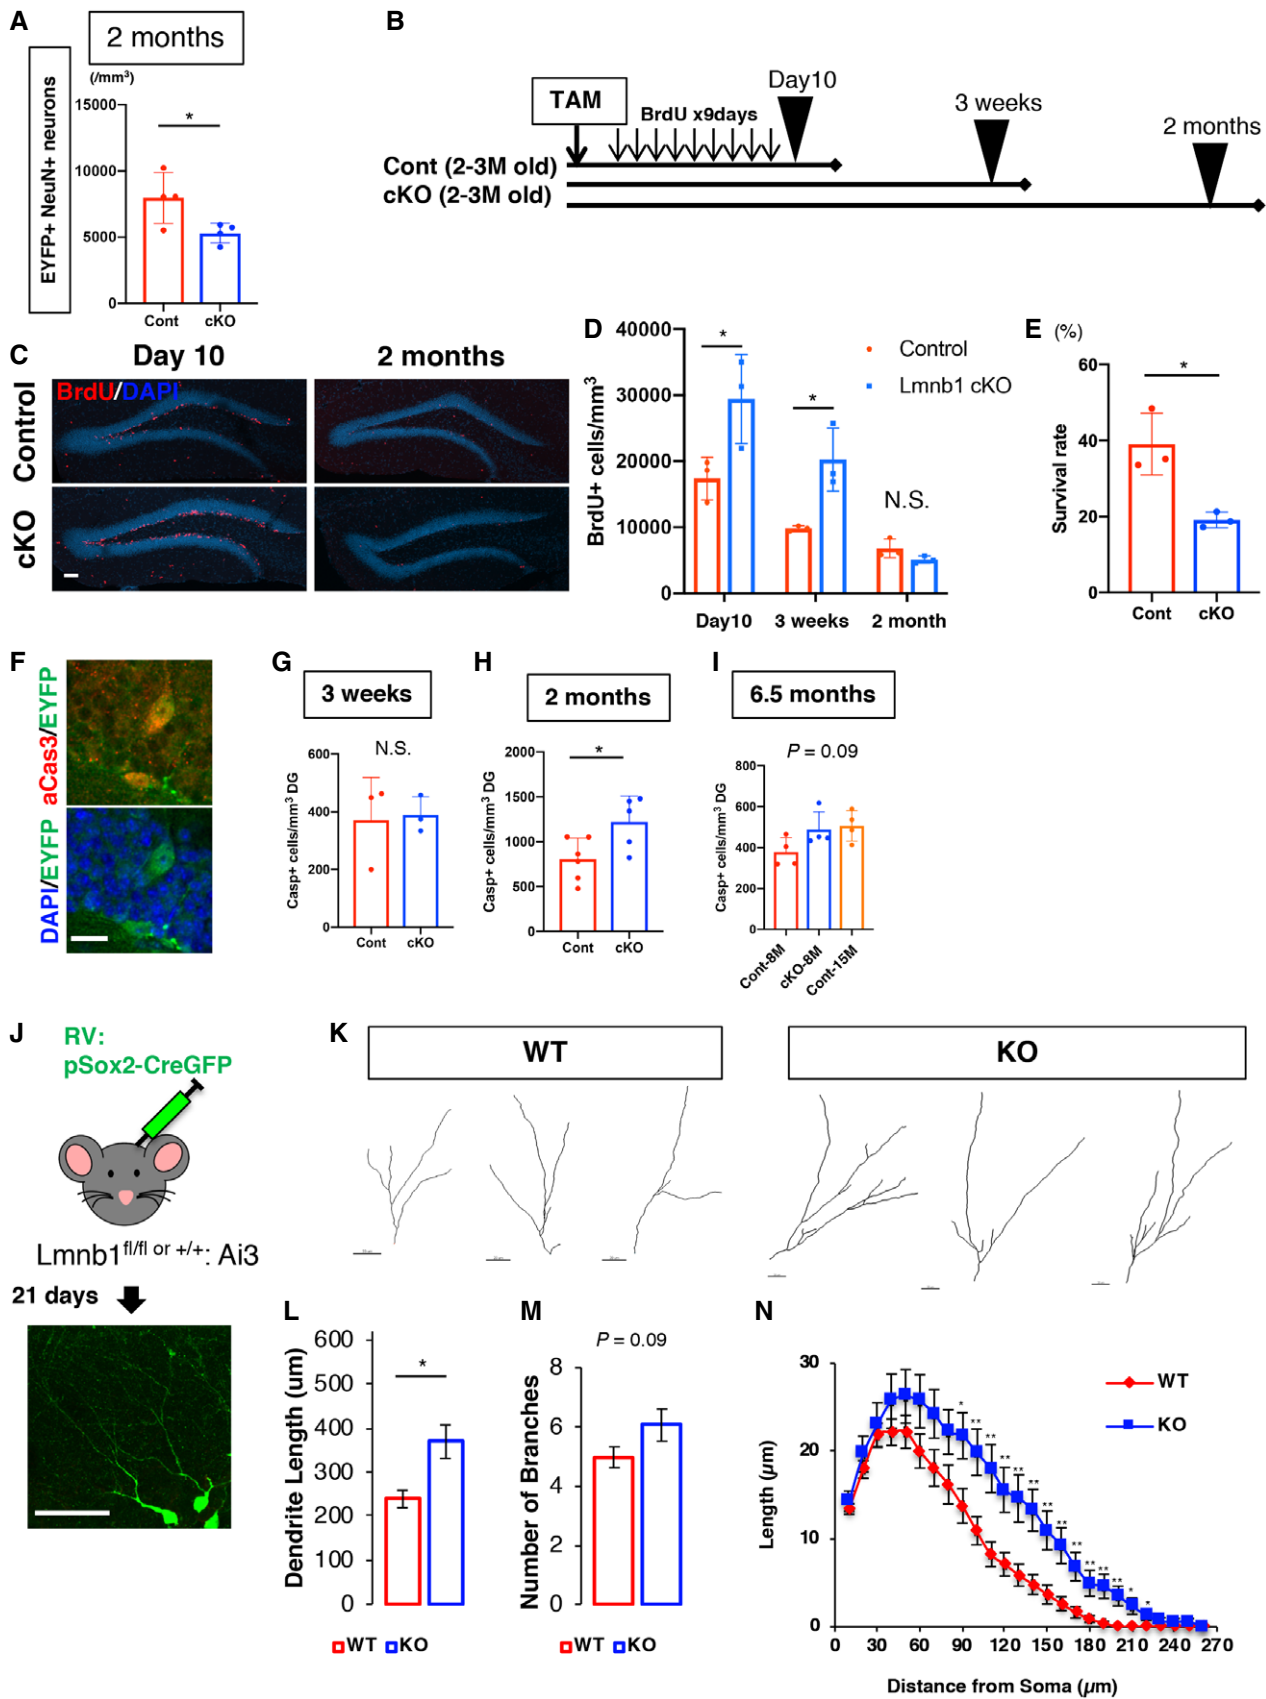

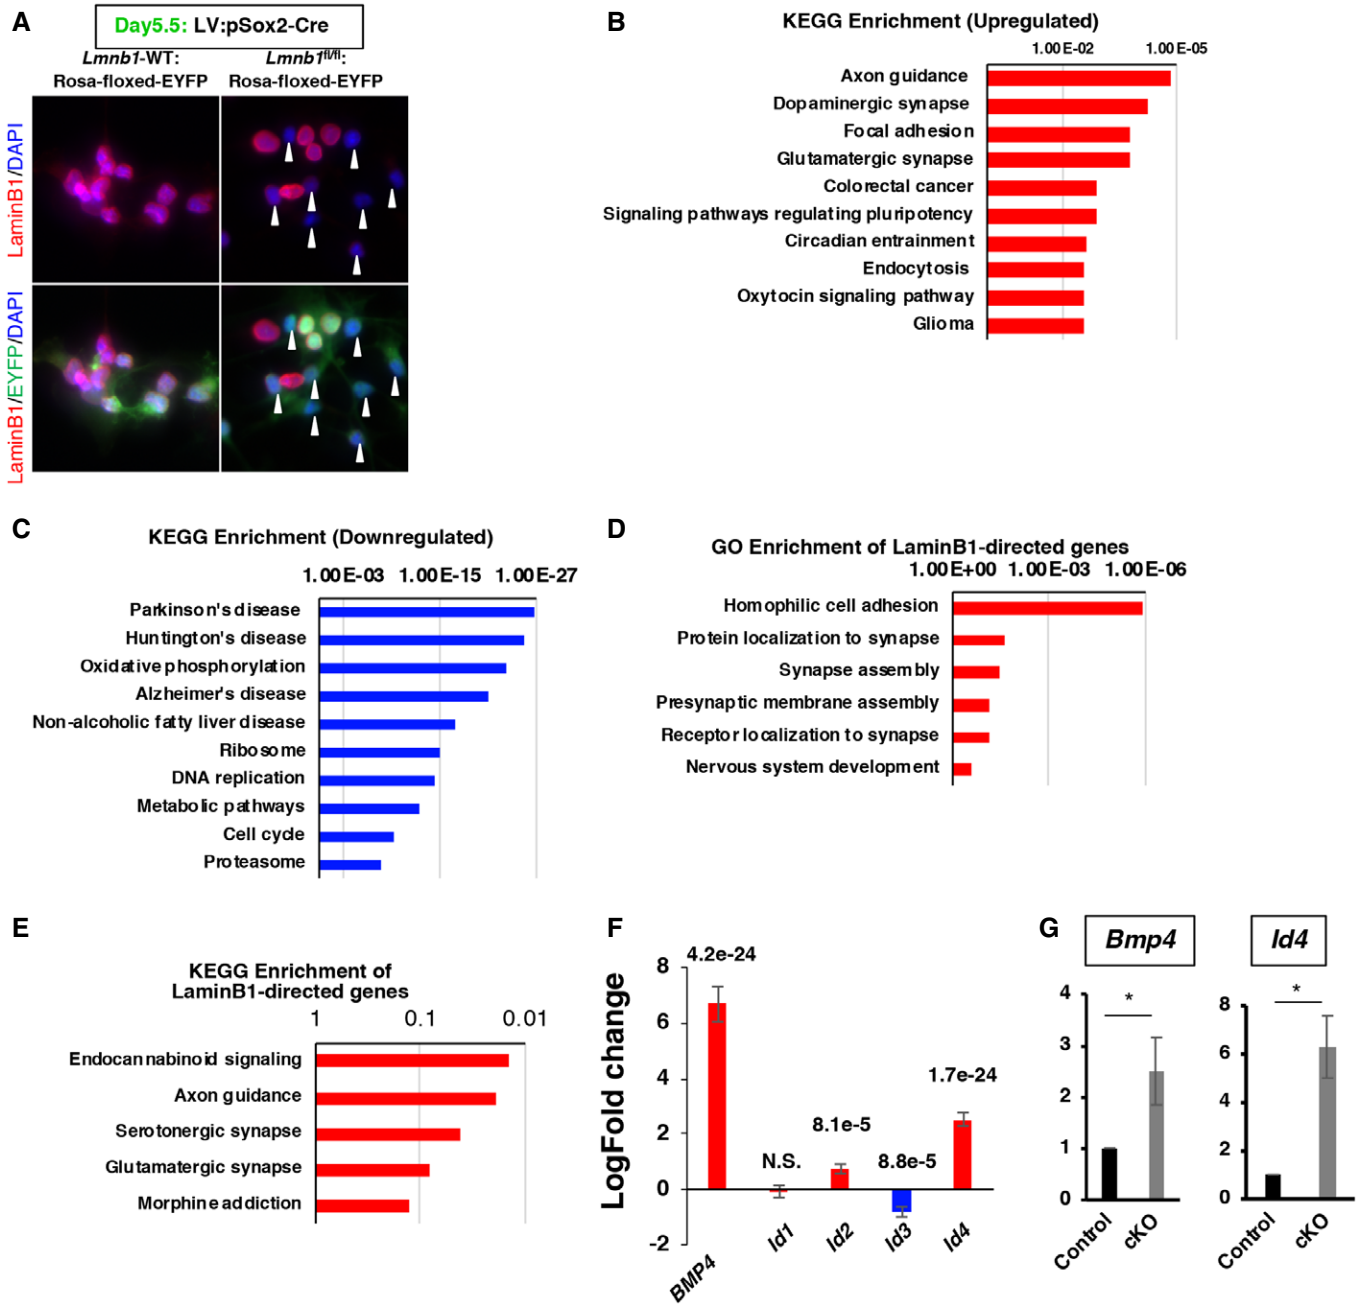

**Figure EV5. Gene pathways regulated by lamin B1 in NPCs.**

A Confirmation of lamin B1 depletion after the delivery of LV; pSox2-Cre. Closed white arrowheads indicate the depletion of lamin B1 immunoreactivity in right panels. Scale bar = 25  $\mu$ m.

B, C GO and KEGG pathway enrichment analyses of differentially expressed genes.

D, E GO and KEGG enrichment analyses for lamin B1-directed upregulated genes.

F Fold change expression of *Bmp4* and *Id1-4* from the transcriptomic analysis in cKO-NPCs,  $n = 3$ , DEseq2 for statistical test. Data are presented as mean  $\pm$  SEM.

G qRT-PCR validation of *Bmp4* and *Id4* upregulation in cKO-NPCs (*Bmp4*, \* $P = 0.022$ ; *Id4*, \* $P = 0.015$ , one-sample  $t$ -test,  $n = 3$ ). Data are presented as mean  $\pm$  SD.
